# Supplementary material for: Feasibility and Effects of Digital Interventions to Support People in Recovery From Substance Use Disorders: Systematic Review
Source: PubMed Central journal article supplement (PMC6127498; doi:10.2196/jmir.9873), 2018-08-23
Supplement: jmir_v20i8e255_app1.pdf [file jmir_v20i8e255_app1.pdf]

## Multimedia Appendix 1. Intervention and study characteristics.

| <b>Intervention brand name</b><br>(First author if no brand)<br>References   | <b>Simple / Complex</b> | <b>Country</b> | <b>Type of intervention</b>                                                                                                                                                  | <b>Targeted groups:</b><br><b>Age</b><br><b>Gender</b><br><b>Substance</b> | <b>Type of study:</b><br><b>Design</b><br><b>N</b><br><b>Follow up</b> |
|------------------------------------------------------------------------------|-------------------------|----------------|------------------------------------------------------------------------------------------------------------------------------------------------------------------------------|----------------------------------------------------------------------------|------------------------------------------------------------------------|
| Agyapong [47-49]                                                             | Simple                  | Ireland        | Stand alone, text messaging, mobile platform                                                                                                                                 | Adults<br>Men and women<br>Alcohol                                         | Quant/ control<br>N=54<br>3 months                                     |
| Alemi [50]                                                                   | Simple                  | USA            | Integrated, online counseling, desktop and mobile platforms                                                                                                                  | Adults<br>Men and women<br>Mixed substances                                | Quant/<br>no control<br>N=79<br>4 months                               |
| Andrade [51]                                                                 | Simple                  | Brazil         | Stand alone, online counseling with CBT elements and drinking monitoring, mobile platform                                                                                    | Adults<br>Men and women<br>Alcohol                                         | Quant/<br>no control<br>N=312<br>1 month                               |
| Aschbrenner [52, 53]                                                         | Simple                  | USA            | Integrated, text messaging and monitoring (medication compliance) and daily support (coping strategies), mobile platform                                                     | Adults<br>Men and women<br>Alcohol                                         | Qualitative<br>N=17<br>3 months                                        |
| Bischof [54]                                                                 | Simple                  | Germany        | Integrated, stepped care with computerized feedback on monitored stage of change (TTM), face to face counseling and follow up telephone counseling, mobile/ desktop platform | All ages<br>Men and women<br>Alcohol                                       | Quant/ control<br>N=408<br>12 months                                   |
| Bjerke [55]                                                                  | Simple                  | Norway         | Integrated, text messaging, mobile platform                                                                                                                                  | Adults<br>Men and women<br>Mixed substances                                | Qualitative<br>N=16<br>4 months                                        |
| <b>My Assessment</b> [56]                                                    | Simple                  | Australia      | Integrated, electronic psychosocial assessment, mobile platform                                                                                                              | Adolescents<br>Men and women<br>Mixed substances                           | Quant/ control<br>N=339<br>6 months                                    |
| <b>IBM-H</b> (Interpretation Bias Modification-Hostility) [57]               | Simple                  | USA            | Stand alone, 8 session intervention designed to modify interpretations of social situations to reduce hostility vs. videos on healthy habits and self-care, web platform.    | Adults<br>Men and women<br>Alcohol                                         | Quant/ control<br>N=58<br>2 months                                     |
| Gagnon [58]                                                                  | Simple                  | Canada         | Integrated, tailored audiovisual messages (safer injection), web platform                                                                                                    | Adults<br>Men and women<br>Opioids                                         | Quant/ control<br>N=260<br>3 months                                    |
| <b>ESQYIR</b> (Educating & Supporting inquisitive Youth in Recovery) [59-61] | Simple                  | USA            | Stand alone, text messaging (including self-monitoring, support), mobile platform                                                                                            | Adolescents<br>Men and women<br>Mixed substances                           | Quant/ control<br>and qual<br>N=80<br>9 months                         |
| Haug [62]                                                                    | Simple                  | Switzerl.      | Integrated, text messaging (including monitoring, support, online counseling), mobile platform                                                                               | Adults<br>Men and women<br>Alcohol and cannabis                            | Mixed methods<br>N=50<br>6 months                                      |
| Ingersoll [63]                                                               | Simple                  | USA            | Integrated, text messaging (including monitoring, counseling), mobile platform                                                                                               | Adults<br>Men and women<br>Mixed substances                                | Quant/ control<br>N=63<br>6 months                                     |
| Lucht [64]                                                                   | Simple                  | Germany        | Integrated, text messaging (including monitoring, telephone support), mobile platform                                                                                        | Adults<br>Men and women<br>Alcohol                                         | Quant/ control<br>N=80<br>2 months                                     |

|                                                                                       |         |           |                                                                                                                                                                                      |                                                                                                        |                                                                                    |
|---------------------------------------------------------------------------------------|---------|-----------|--------------------------------------------------------------------------------------------------------------------------------------------------------------------------------------|--------------------------------------------------------------------------------------------------------|------------------------------------------------------------------------------------|
| Reback [65]                                                                           | Simple  | USA       | Stand alone. Theory- based Health Belief Model (HBM), Social Cognitive Theory (SCT), and Social Support Theory (SST) SMS conditions mobile platform                                  | Adults<br>Men<br>Stimulants                                                                            | Quant/ control but no randomization<br>N=52<br>1 month                             |
| Rooke [66]                                                                            | Simple  | Australia | Stand alone, described only as a “smart phone app” with no additional information provided, mobile platform                                                                          | Adolescents<br>Men and women<br>Cannabis                                                               | Quant/<br>no control<br>N=111<br>2 months                                          |
| <b>IHMD</b> (In-Home-Messaging-Device) [67]                                           | Simple  | USA       | Integrated, text messaging (including monitoring, skills development), mobile platform                                                                                               | Adults<br>Uncertain gender<br>Alcohol                                                                  | Quant/ control<br>N=121<br>3 months                                                |
| <b>MEMS</b> [68]                                                                      | Simple  | USA       | Integrated, text messaging (including medication monitoring, support, reminders), mobile platform                                                                                    | Adults<br>Men and women<br>Alcohol                                                                     | Quant/ control<br>N=76<br>2 months                                                 |
| <b>Navigating my Journey</b> [69]                                                     | Simple  | USA       | Integrated online relapse prevention supplement for adolescents in SUD treatment. Based on MET/CBT, compared to attention control                                                    | Adolescents<br>Men and women<br>Mixed                                                                  | Quant/ control<br>N=129<br>6 months                                                |
| <b>No intervention</b> [45]                                                           | Simple  | USA       | Text messaging content to improve medication compliance, but no specific intervention                                                                                                | Adults<br>Men and women<br>Opioids                                                                     | Survey<br>N=97<br>NA                                                               |
| <b>Overcoming Addictions</b> [70]                                                     | Complex | USA       | Stand alone, self-help program consisting of the four modules in the Smart Recovery program (education and exercises) and additional information links/pop-ups, desktop platform     | Adults<br>Men and women<br>Alcohol                                                                     | Quant/ control<br>N=189<br>6 months                                                |
| <b>A-CHESS</b> [71-77]                                                                | Complex | USA       | Integrated, the alcohol version of more generic program consisting of monitoring, information, support and interactivity with counselors and peers, mobile platform                  | All ages<br>Men and women<br>Alcohol;<br>alcohol and<br>cannabis                                       | Quant/<br>control;<br>quant/no<br>control;<br>mixed<br>N=29-349<br>up to 12 months |
| <b>LBMI-A</b> (Location-Based Monitoring/ Intervention for Alcohol Use Disorders [78] | Complex | USA       | Stand alone, CBT-inspired program with seven modules consisting of psycho-educational material and tools, and monitoring, mobile/ desktop platform                                   | Adolescents and adults<br>Men and women<br>Alcohol and<br>cannabis                                     | Quant/ control<br>N=54<br>6 weeks                                                  |
| <b>Check-In Program</b> [79]                                                          | Complex | USA       | Integrated, two skill-based interactive modules: “functional analysis” and “self-management”, mobile platform                                                                        | Adults<br>Men and women<br>Opioids and<br>mixed substances                                             | Mixed methods<br>N=50<br>3 months                                                  |
| <b>Health Call</b> [80, 81]                                                           | Complex | USA       | Integrated, monitoring program based on 30 daily questions, offers contact with counselor, mobile platform with smartphone<br>A second study compared Health Call plus MI to MI only | Adolescents<br>Men and women<br>Alcohol and<br>cannabis<br>Adults<br>Men and women<br>Mixed substances | Mixed methods<br>N=84<br>2 months<br><br>Mixed methods<br>N=47<br>2 months         |
| <b>MyFYR</b> (My First                                                                | Complex | USA       | Integrated, information, monitoring, care management, support, self-help                                                                                                             | Adults<br>Men and women                                                                                | Quant/no<br>control                                                                |

|                                |         |           |                                                                                                                               |                                                        |                                     |
|--------------------------------|---------|-----------|-------------------------------------------------------------------------------------------------------------------------------|--------------------------------------------------------|-------------------------------------|
| Year in Recovery)<br>[82]      |         |           | groups, mobile/ desktop platform                                                                                              | Alcohol and mixed substances                           | N=198<br>12 months                  |
| <b>Snow Control</b><br>[83]    | Complex | Switzerl. | Stand alone, eight CBT, MI, self-control based, interactive modules, mobile/desktop platform                                  | Adults<br>Men and women<br>Stimulants                  | Quant/ control<br>N=196<br>6 months |
| <b>Can Reduce</b><br>[84]      | Complex | Switzerl. | Stand alone, same as Snow Control but adjusted to cannabis users, one study arm with chat room added, mobile/desktop platform | Adolescents and adults<br>Uncertain gender<br>Cannabis | Quant/ control<br>N=308<br>3 months |
| Tait<br>[85]                   | Complex | Australia | Stand alone, CBT, MI, harm avoidance based, automated, self-guided sequential modules, desktop platform                       | Adolescents<br>Uncertain gender<br>Stimulants          | Quant/ control<br>N=160<br>6 months |
| <b>Quit the Shit</b><br>[86]   | Complex | Germany   | Stand alone, self-regulation/control based, four phases, self-monitor, weekly feedback/chat, desktop platform                 | Adolescents and adults<br>Men and women<br>Cannabis    | Quant/ control<br>N=206<br>2 months |
| <b>No intervention</b><br>[46] | Complex | Germany   | Acceptance of digital after care programs, not only SUD, no specific intervention                                             | Adolescents and adults<br>men and women<br>NA          | Survey<br>N=374<br>NA               |
